# Supplementary material for: The Histone Demethylase LSD1/ZNF217/CoREST Complex is a Major Restriction Factor of Epstein-Barr Virus Lytic Reactivation
Source: Research Square preprint supplement (doi:10.21203/rs.3.rs-5649616/v1), 2025-01-12
Supplement: Supplementary file 1 [file 76ab37f3ecd9744b07a0db8a.xlsx]

## Sheet: Reagents, antibodies, and kits
Reagents	Source	Identifier
DMSO	Fisher Scientific	BP231-100
SP2509	MedChemExpress	HY-12635
Corin	MedChemExpress	HY-111048
Ganciclovir	MedChemExpress	HY-13637
Doxycycline hyclate	Sigma-Aldrich	D9891-1G
(Z)-4-Hydroxytamoxifen	Sigma-Aldrich	H7904-25MG
Polyclonal Rabbit Anti-Human IgG	Aligent	A042301-2
Puromycin Dihydrochloride	Thermo Fisher Scientific	A1113803
Hygromycin B	Sigma-Aldrich	400052
G418 Sulfate Solution (50 mg/mL)	GeminiBio	400113
Blasticidin	InvivoGen	ant-bl-5
Polybrene	Sigma-Aldrich	TR1003G
Pierce Protein A/G Magnetic Beads	Thermo Fisher Scientific	88803
T4 DNA ligase	New England Biolabs	M0202L
T4 DNA Ligase Reaction Buffer	New England Biolabs	B0202S
Proteinase K	New England Biolabs	P8107S
TransIT-LT1 Transfection Reagent	Mirus Bio	MIR 2306
Standard Fetal Bovine Serum, Qualified, USDA-Approved Regions	Thermo Fisher Scientific	10437028
RPMI 1640 Medium	Thermo Fisher Scientific	11875085
DMEM, high glucose, pyruvate	Thermo Fisher Scientific	11995081
BD Difco Dehydrated Culture Media: LB Agar, Lennox	Fisher Scientific	DF0401-17
2x Laemmli Sample Buffer	Bio-Rad	1610737
Formaldehyde solution	Sigma-Aldrich	F8775
DNase I	Roche	10104159001
Csp6I	Thermo Fisher Scientific	FD0214
RNase A	Thermo Fisher Scientific	EN0531
cOmplete, EDTA-free Protease Inhibitor Cocktail	Sigma-Aldrich	11873580001
CRISPR-Cas9 screen library
Brunello CRISPR Lentivirus Library	Broad Institute	N/A
Antibodies	Source	Identifier
EBV gp350 (72A1) mouse monoclonal antibody	BioXCell	N/A
EBV ZEBRA Antibody (BZ1)	Santa Cruz Biotechnology	sc-53904
Anti-EBV Ea-D Antibody (0261)	Santa Cruz Biotechnology	sc-58121
EBV Ea-D antibody [0261]	GeneTex	GTX30757
Epstein Barr Virus p18 Polyclonal Antibody	Thermo Fisher Scientific	PA1-73003
KSHV ORF57 antibody	Rockland	600-401-A94S
KSHV ORF26 antibody	Novus Biologicals	NBP1-47357
RCOR1/CoREST antibody	Cell Signaling Technology	14567S
KDM1A/LSD1 antibody	Cell Signaling Technology	2139S
ZNF217 antibody	Cell Signaling Technology	82306S
HDAC1 antibody	Cell Signaling Technology	5356T
HDAC2 antibody	Cell Signaling Technology	5113T
KMT2D antibody	Proteintech	27266-1-AP
BCL6 antibody	Cell Signaling Technology	14895S
CTBP1 antibody	Cell Signaling Technology	8684S
PHF12 antibody	Proteintech	24485-1-AP
MYC antibody	Cell Signaling Technology	5605S
GAPDH antibody	Cell Signaling Technology	5174S
Mouse monoclonal anti-GAPDH antibody	Proteintech	60004-1-Ig
HA-Tag (C29F4) Rabbit mAb	Cell Signaling Technology	3724S
HA-Tag (6E2) Mouse mAb	Cell Signaling Technology	2367S
V5-Tag (D3H8Q) Rabbit mAb	Cell Signaling Technology	13202S
H3K9ac antibody	Cell Signaling Technology	9649S
H3K27ac antibody	Abcam	ab4729
H3K4me1 antibody	Cell Signaling Technology	5326S
H3K4me2 antibody	Cell Signaling Technology	9725S
H3K4me3 antibody	Cell Signaling Technology	9751S
Histone H3K9me2 antibody (pAb)	Active Motif	39753
Histone H3K9me3 antibody (pAb)	Active Motif	39161
Histone H3K27me3 antibody	Cell Signaling Technology	9733S
Normal Rabbit IgG	Cell Signaling Technology	2729S
IRDye 800CW Goat anti-Mouse IgG (H + L)	LI-COR Biosciences	926-32210
IRDye 680RD Goat anti-Rabbit IgG (H + L)	LI-COR Biosciences	926-68071
Anti-rabbit IgG, HRP-linked Antibody	Cell Signaling Technology	7074V
Anti-mouse IgG, HRP-linked Antibody	Cell Signaling Technology	7076V
Anti-rat IgG, HRP-linked Antibody	Cell Signaling Technology	7077S
Anti-goat IgG, HRP-linked Antibody	Thermo Fisher Scientific	A24452
Critical Kits	Source	Identifier
Blood & Cell Culture DNA Maxi Kit (10)	Qiagen	13362
QiAquick PCR Purification Kit	Qiagen	28106
QIAprep Spin Miniprep Kit	Qiagen	27106
DNeasy Blood& Tissue Kit	Qiagen	69504
QIAquick Gel Extraction Kit	Qiagen	28704
iScript Reverse Transcription Supermix	Bio-Rad	1708841
PowerUp SYBR Green PCR Master Mix	Applied Biosystems	A25778
RossetteSep Human B cells	STEMCELL Technologies	15064
EasySep Negative Human B cell	STEMCELL Technologies	19054
Cy5 Conjugation Kit (Fast)	Abcam	ab188288
RNase-Free DNase Set	Qiagen	79254
NEBNext Ultra II Directional RNA Library Prep with Sample Purification Beads	New England Biolabs	E7765S
NEBNext Multiplex Oligos for Illumina (Index Primers Set 2)	New England Biolabs	E7500S
NEBNext Multiplex Oligos for Illumina (Index Primers Set 1)	New England Biolabs	E7335S
