# Supplementary material for: The Histone Demethylase LSD1/ZNF217/CoREST Complex is a Major Restriction Factor of Epstein-Barr Virus Lytic Reactivation
Source: Research Square preprint supplement (doi:10.21203/rs.3.rs-5649616/v1), 2025-01-12
Supplement: Supplementary file 2 [file b4f3fba170e0d95c43528769.xlsx]

## Sheet: sgRNAs, plasmids, and primers
sgRNAs	Sense strand (5'-3')	Antisense strand (5'-3')
KDM1A-sg1	TTTCTGAAACAGGATCGTGT	ACACGATCCTGTTTCAGAAA
KDM1A-sg2	CATGACCGGATGACTTCTCA	TGAGAAGTCATCCGGTCATG
ZNF217-sg1	CCACGGCGAAGCGCCCTCCG	CGGAGGGCGCTTCGCCGTGG
ZNF217-sg2	CAAAATCTCACCCTGAAACG	CGTTTCAGGGTGAGATTTTG
RCOR1-sg1	AGAAAAGCATGGGTACAACA	TGTTGTACCCATGCTTTTCT
RCOR1-sg2	CCAATAATGGCCAGAATAAA	TTTATTCTGGCCATTATTGG
CTBP1-sg1	TGATGCCCAAGGTCTCCCCG	CGGGGAGACCTTGGGCATCA
CTBP1-sg2	AATCCGGACGATGATGCGGA	TCCGCATCATCGTCCGGATT
BCL6-sg1	GGAGGATGCAGAATCCCTCA	TGAGGGATTCTGCATCCTCC
BCL6-sg2	AGATCCTGAGATCAACCCTG	CAGGGTTGATCTCAGGATCT
PHF12-sg1	ACGAGGCAGAAAAGCGCAGT	ACTGCGCTTTTCTGCCTCGT
PHF12-sg2	GTCGACATCATTCTGCTCAG	CTGAGCAGAATGATGTCGAC
KMT2D-sg1	CCCCTATCCTAGTCCTACGG	CCGTAGGACTAGGATAGGGG
KMT2D-sg2	CTATGCAACCCAAGGAACCA	TGGTTCCTTGGGTTGCATAG
MYC-sg1	CTTCGGGGAGACAACGACGG	CCGTCGTTGTCTCCCCGAAG
MYC-sg2	AGAGTGCATCGACCCCTCGG	CCGAGGGGTCGATGCACTCT
Plasmids	Source	Identifier
pLentiGuide-Puro	Addgene	52963
pLentiGuide-Zeo	Addgene	160091
pLenti-spBsmBI-sgRNA-Hygro	Addgene	62205
pXPR-011	Addgene	59702
PsPAX2	Addgene	12260
pCMV-VSV-G	Addgene	8454
Primers	Forward (5'-3')	Reverse (5'-3')
BZLF1 promoter	GCAAGGTGCAATGTTTAGTGAGTT	GCTGGTGCCTTGGCTTTAAAG
oriLyt L	CCCTCAGTGTTCGCCAGCTT	AGGGTGGGAGCAATTCCAACAC
oriLyt R	CGCTGGTTAAGCTGACGACCT	GCCCTGGCTAGGAAAGGGAGGAA
BALF5	GAGCGATCTTGGCAATCTCT	TGGTCATGGATCTGCTAAACC
BZLF1	AGGCCAGCTAACTGCCTATC	TGATTCTGGGTTATGTCGGA
BMRF1	CGTGCCAATCTTGAGGTTTT	CGGAGGCGTGGTTAAATAAA
BLLF1	TGGCGAGTTTGCGTCCTCAG	CGTCCAGTGTCACGATTTCTTGG
18S rRNA	AACCAGACAAATCGCTCCAC	CCTGCGGCTTAATTTGACTC
3C assay primers	Akata Genome Coordinate	Sequence (5'-3')
BZLF1 anchor	89914-89933	GGAATGCGTTACTACAAGTG
T1	112290-112310	TGCCGAGACCCCGAGTATTAT
T2	123499-123520	GGCCCACTGGGAAATAGTAGCT
T3	129546-129568	GGAAAACATATCCTTCAGGTTGG
T4	134815-134926	GCCAGGGCCCGGTAAAGCAG
T5	138521-138540	GTGGGAGTGCTGTGCCTAGG
T6	143971-143990	CCCAAGGTCTCTCACCCTGG
T7	148268-148287	GAGATGTTCAGGGGTGGCCG
T8	154485-154504	AGCTTGTCCCGGCACACGGC
T9	160392-160411	CTCAGCTCAACCGCCAGGGC
T10	166408-166427	AAGTCCAAACAGGACACAGA
T11	2645-2664	ATAGCATCATCGCTGGGCTG
T12	9134-9153	TCTTCCTGGGCCCCTGGGAG
